# Supplementary material for: Study on Characteristics and Lignification Mechanism of Postharvest Banana Fruit during Chilling Injury
Source: MDPI journal article supplement (doi:10.3390/foods12051097), 2023-03-04
Supplement: s1 [file s1]

## Supplementary material

**Figure S1.** Changes of amylase activity in banana peel during storage at 6°C and 25°C.  $\alpha$ -amylase activity (A),  $\beta$ -amylase activity (B). Each data point represents a mean  $\pm$  standard error (n=3). “\*” means a significant difference between control and experimental fruit at 5 % level.

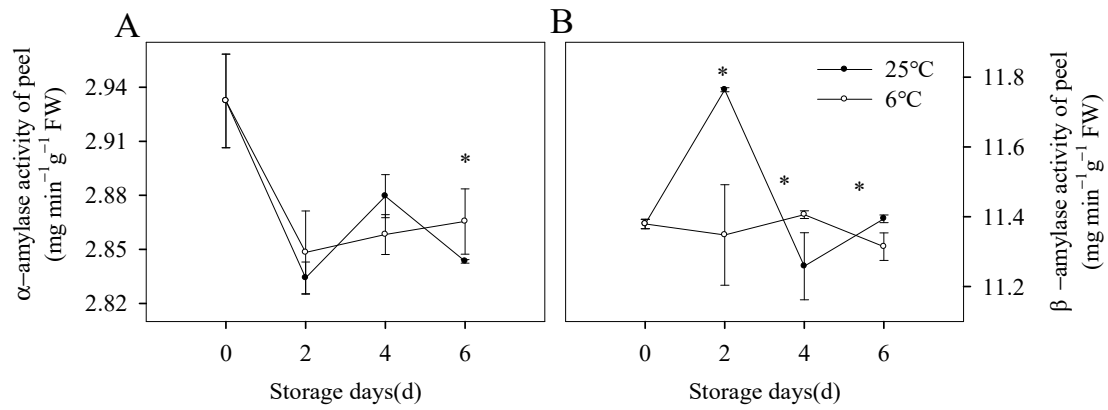

**Figure S2.** Ultrastructural changes of banana peel during storage at 6°C and 25°C were observed by scanning electron microscope. Parenchyma cells (A) and vascular cells (B) of banana peel during storage.

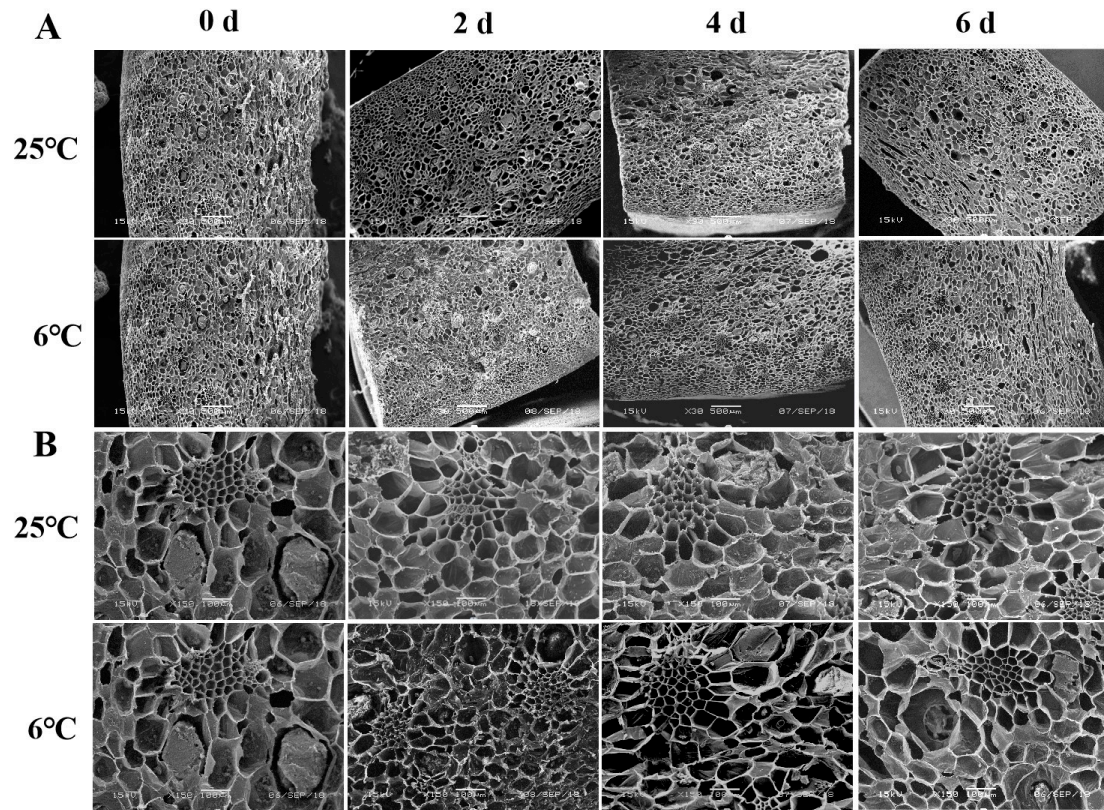

**Table S1.** Primers used for RT-qPCR.

| <b>Gene Name</b> | <b>Gene ID</b> | <b>Forward (5'-3')</b>      | <b>Reverse (5'-3')</b>      |
|------------------|----------------|-----------------------------|-----------------------------|
| <i>POD1</i>      | Ma02_t04930.1  | ACAACAACGTGGC<br>TGAGAAGGA  | GCAGTCGGTGGT<br>GGCAGATTA   |
| <i>PAL</i>       | Ma01_t04420.1  | CACAGGAGGACCA<br>AGCAAGGAG  | GCAGCGGACGAA<br>GGCAATGT    |
| <i>LAC3</i>      | Ma01_t22390.1  | ACATCTCCGACGC<br>ATTCACCAT  | CCGAGCATGAGC<br>ACCGAAGT    |
| <i>CCR4</i>      | Ma01_t00690.1  | AGGAGGAAGGTG<br>TGGACGTGAAG | GGCAACGGCTTA<br>CAAGTGAGGAT |
| <i>CAD2</i>      | Ma04_t12960.1  | GCAGCCTCAAGAC<br>GGAGAAGAC  | GGTGGAGATCAG<br>TGTGGCAGAC  |
| <i>4CL7</i>      | Ma09_t07500.1  | ACGATCACCAACG<br>GCAACACC   | CCTTCAACCTGT<br>CCAGCACGAA  |
| <i>MaAtion-3</i> | Ma09_t08490.1  | TGGTATGGAAG<br>CCGCTGGTA    | TCTGCTGGAA<br>TGTGCTGAGG    |
